# Supplementary material for: Wavelet-based detection of transcriptional activity on a novel Staphylococcus aureus tiling microarray
Source: PubMed Central journal article supplement (PMC3563573; doi:10.1186/1471-2105-13-222), 2012-09-05

expression level

0.0  
-0.5  
-1.0  
-1.5

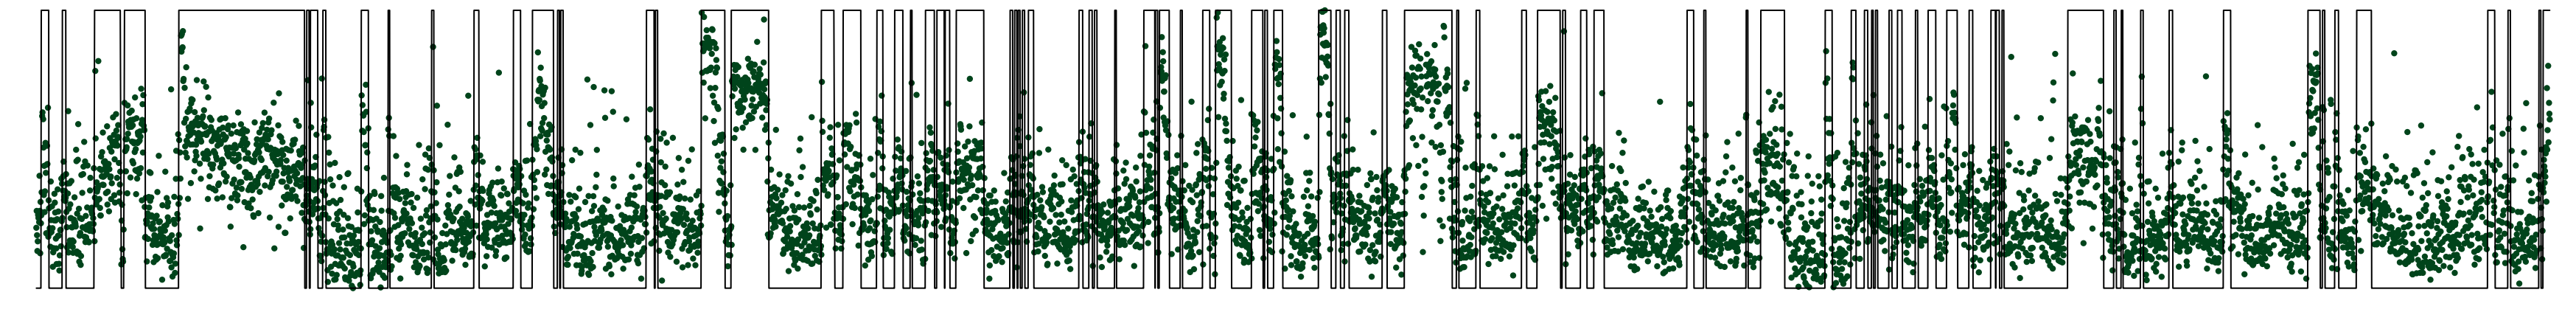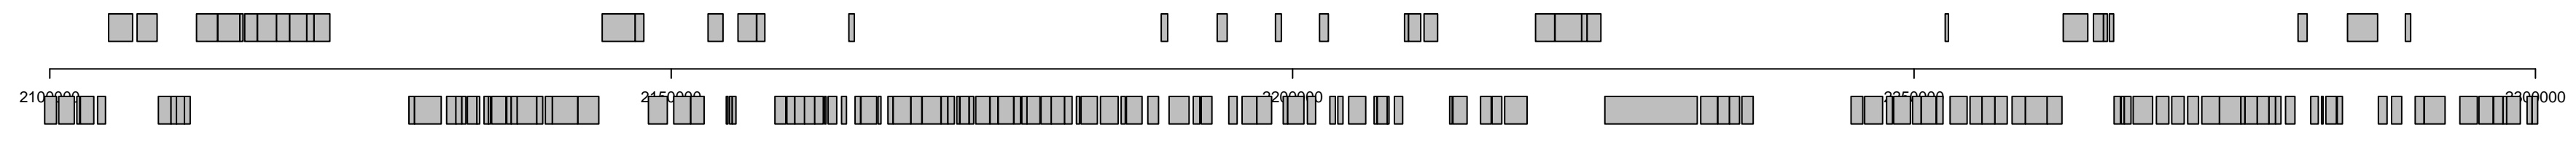

expression level

0.5  
0.0  
-0.5  
-1.0  
-1.5

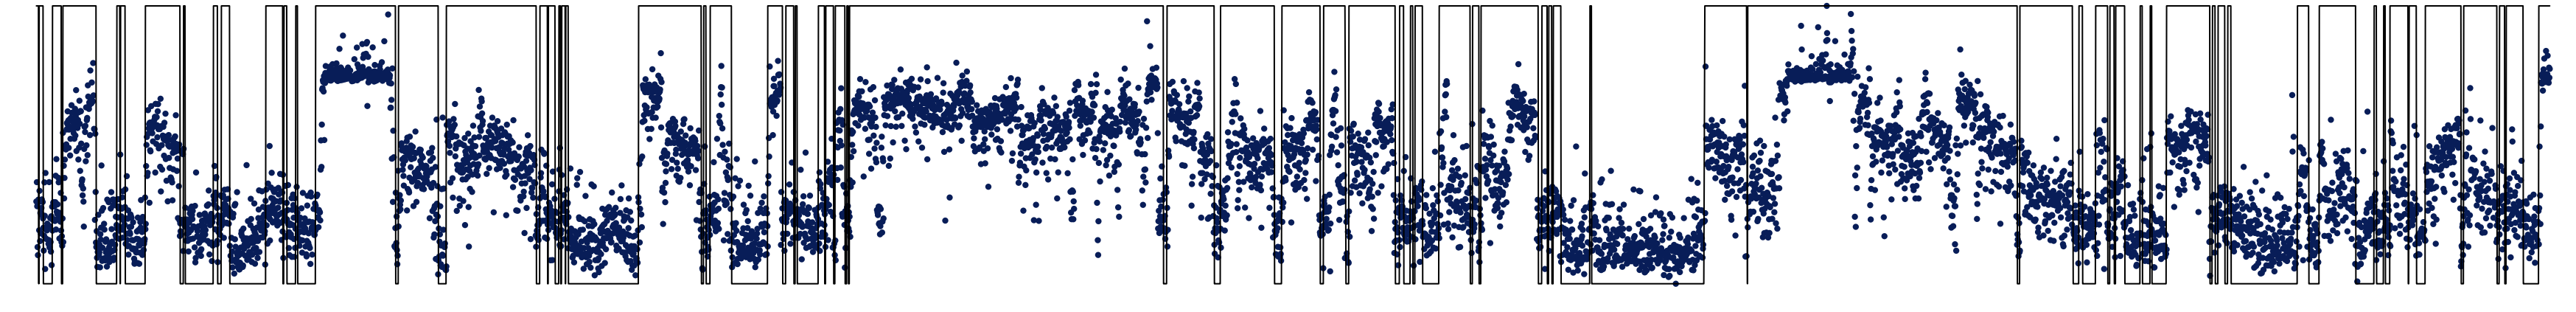

Supplement: 1471-2105-13-222-S5.pdf [file 1471-2105-13-222-S5.pdf]
