# Supplementary material for: Wavelet-based detection of transcriptional activity on a novel Staphylococcus aureus tiling microarray
Source: PubMed Central journal article supplement (PMC3563573; doi:10.1186/1471-2105-13-222), 2012-09-05

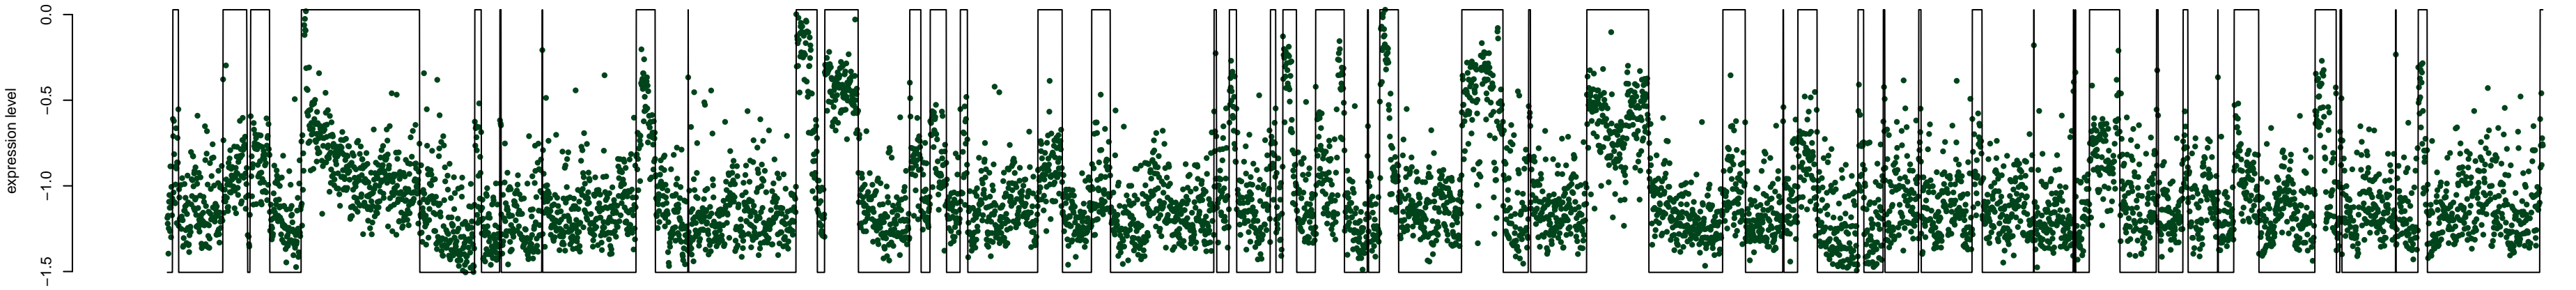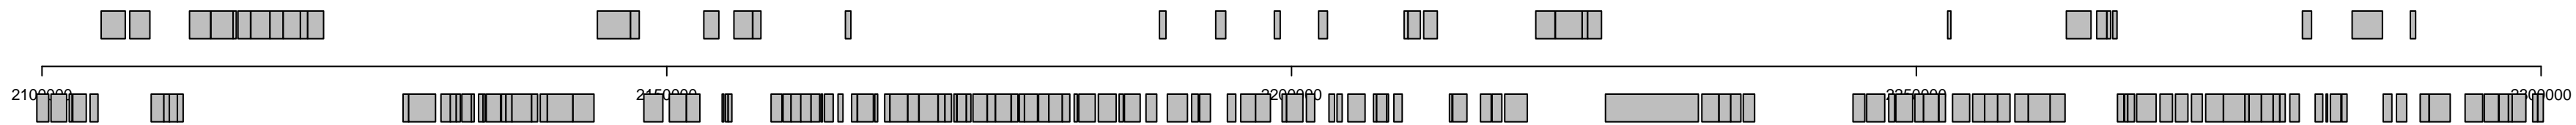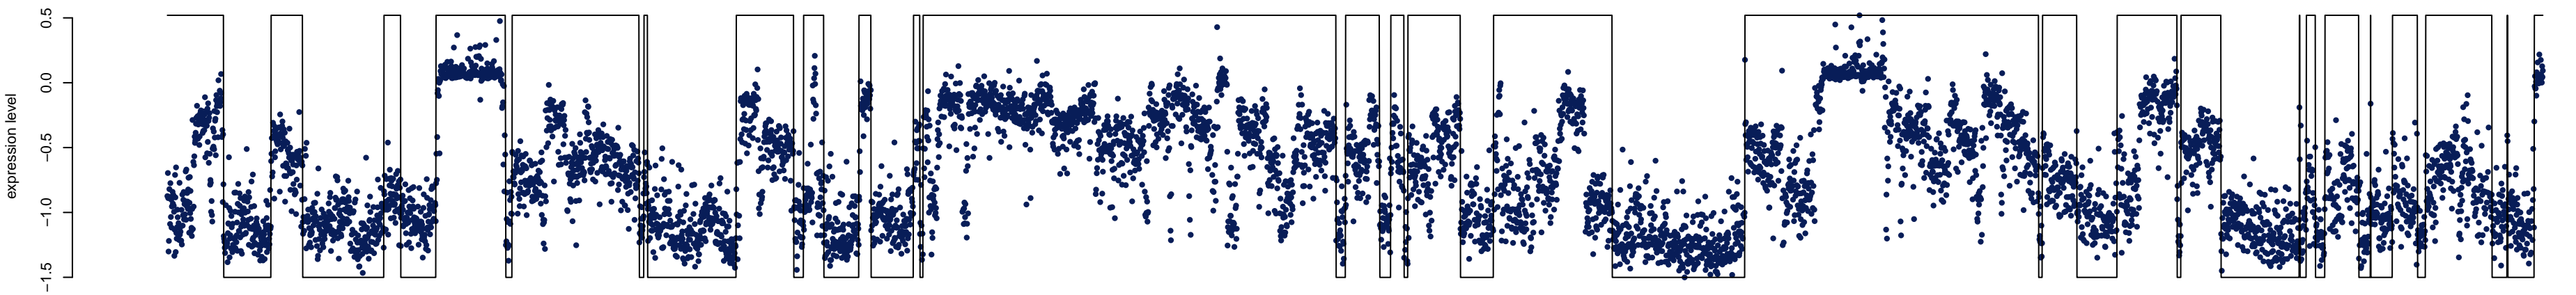

Supplement: 1471-2105-13-222-S6.pdf [file 1471-2105-13-222-S6.pdf]
